# Supplementary material
Source: bioRxiv or medRxiv preprint supplement (https://www.biorxiv.org/highwire/filestream/6591/field_highwire_adjunct_files/18/024869-9.pdf)

SEX Female Male

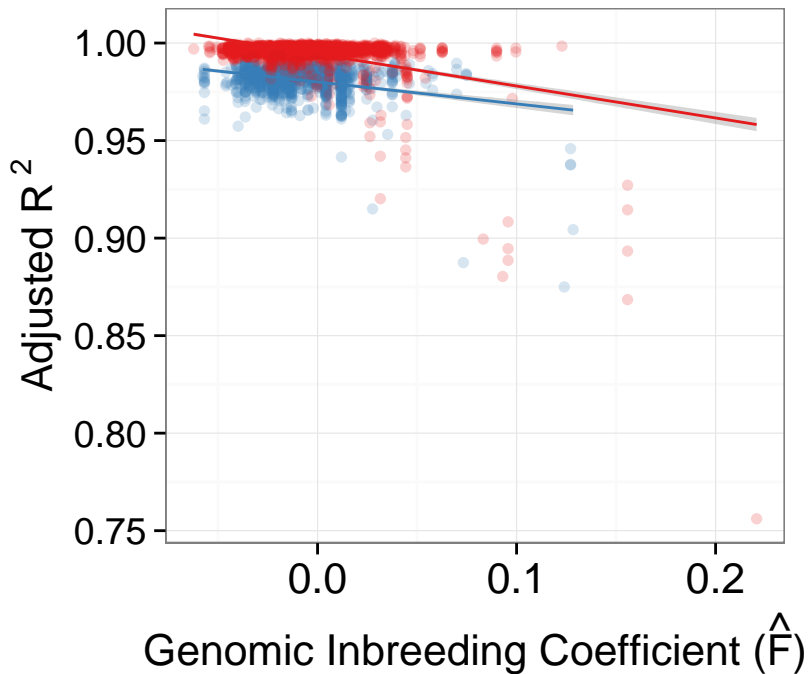

SEX Female Male

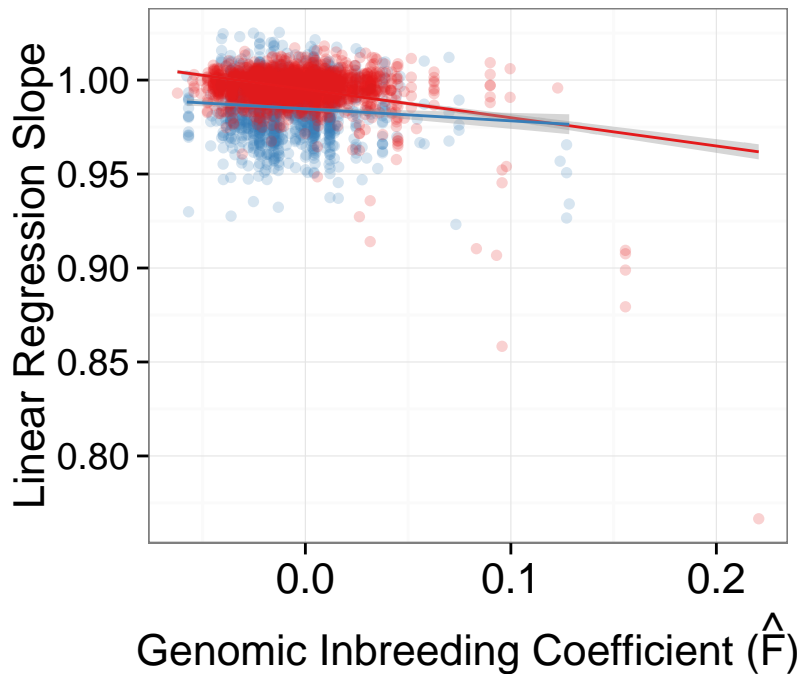

Supplement: Supplementary file [file 024869-9.pdf]
